# Supplementary material for: Vacuum-evaporated all-inorganic cesium lead bromine perovskites for high-performance light-emitting diodes
Source: Royal Society of Chemistry journal article supplement (doi:10.1039/c7tc02477k), 2017-01-01
Supplement: c7tc02477k1.pdf [file c7tc02477k1.pdf]

## Electronic Supplementary Information (ESI)

# Vacuum-evaporated all-inorganic cesium lead bromine perovskites for high-performance light-emitting diodes

Yun Hu, Qiang Wang, Ying-Li Shi, Meng Li, Lei Zhang, Zhao-Kui Wang,\* and Liang-Sheng Liao\*

Jiangsu Key Laboratory for Carbon-Based Functional Materials & Devices, Institute of Functional Nano & Soft Materials (FUNSOM), and Collaborative Innovation Center of Suzhou Nano Science and Technology, Soochow University, Suzhou, Jiangsu 215123, China

\*Email: [lsiao@suda.edu.cn](mailto:lsiao@suda.edu.cn); [zkwang@suda.edu.cn](mailto:zkwang@suda.edu.cn)

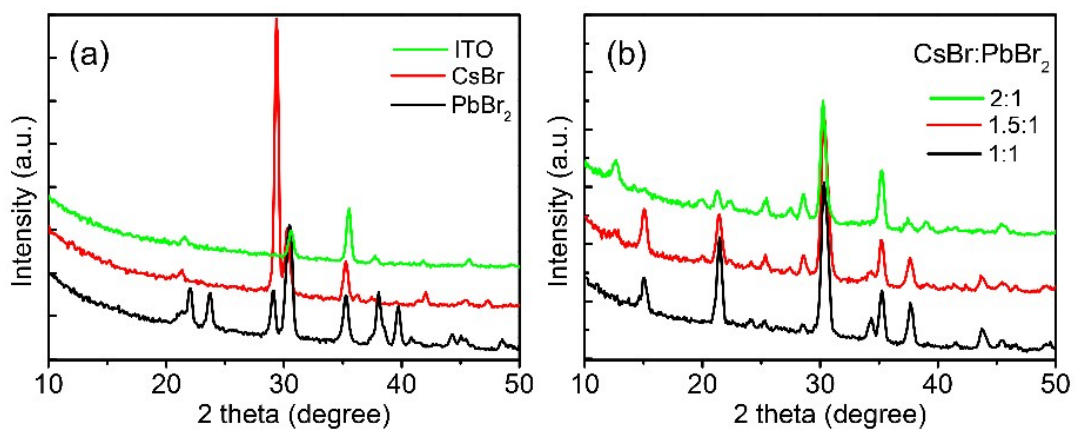

**Fig. S1** XRD patterns of ITO, CsBr and PbBr<sub>2</sub> (a), and thin films with different ratios prepared on ITO (b).

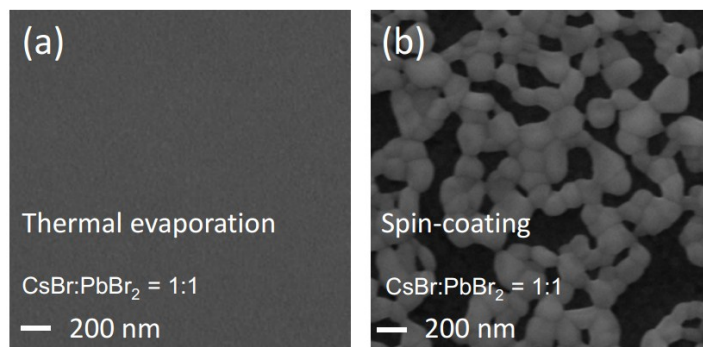

**Fig. S2** Scanning electron microscopy (SEM) images of CsBr:PbBr<sub>2</sub> (1:1) film fabricated from vacuum thermal evaporation (a) and precursor solutions (b).

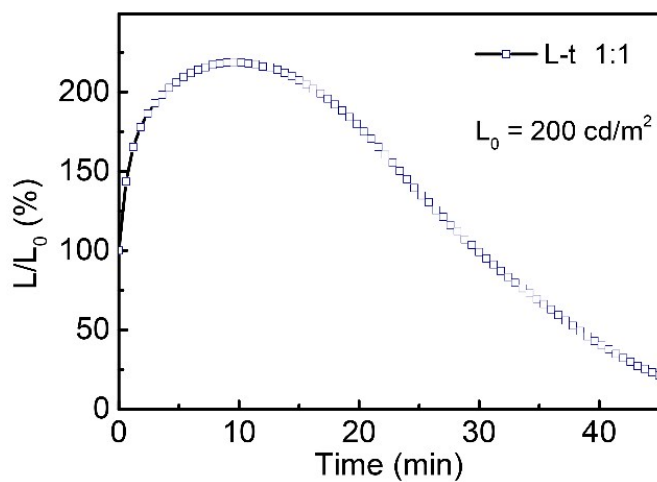

**Fig. S3** Relative luminance intensity versus time characteristics of the (1:1) thin film with an initial luminance of 200 cd/m<sup>2</sup>.
